# Supplementary material for: Atomically precise engineering of spin–orbit polarons in a kagome magnetic Weyl semimetal
Source: Springer Nature journal article supplement (doi:10.1038/s41467-024-46729-3), 2024-03-14
Supplement: 41467_2024_46729_MOESM1_ESM.pdf [file 41467_2024_46729_MOESM1_ESM.pdf]

# Supplementary Information for

## **Atomically precise engineering of spin–orbit polarons in a kagome magnetic Weyl semimetal**

Hui Chen<sup>1,2,3†</sup>, Yuqing Xing<sup>1,2†</sup>, Hengxin Tan<sup>4</sup>, Li Huang<sup>1,2</sup>, Qi Zheng<sup>1,2</sup>, Zihao Huang<sup>1,2</sup>,  
Xianghe Han<sup>1,2</sup>, Bin Hu<sup>1,2</sup>, Yuhao Ye<sup>1,2</sup>, Yan Li<sup>1,2</sup>, Yao Xiao<sup>1,2</sup>, Hechang Lei<sup>5</sup>, Xianggang Qiu<sup>1</sup>,  
Enke Liu<sup>1</sup>, Haitao Yang<sup>1,2,3</sup>, Ziqiang Wang<sup>6</sup>, Binghai Yan<sup>4</sup> and Hong-Jun Gao<sup>1,2,3\*</sup>

Corresponding author: [hjgao@iphy.ac.cn](mailto:hjgao@iphy.ac.cn),

† These authors contributed equally to this work

### **Section I. Additional AFM and STM/S characterization of vacancy repair**

- Supplementary Figure 1. Demonstration of the single vacancy with nc-AFM.
- Supplementary Figure 2. Typical large-scale STM image of S-terminated surface.
- Supplementary Figure 3. Demonstration of the single vacancy repairing with nc-AFM.

### **Section II. Additional data of STS and calculations to support the vacancy repair mechanism**

- Supplementary Figure 4. Topography and  $dI/dV$  spectra of S vacancies before and after vacancy repair.
- Supplementary Figure 5. Transition barrier of a sulfur atom from the bulk to the single vacancy site on the S-surface.
- Supplementary Figure 6. Comparison between artificially-created vacancy and naturally-formed vacancies.

### **Section III. Additional data of step-by-step atomic manipulation**

- Supplementary Figure 7. Step-by-step atomic manipulation of S vacancy aggregates

### **Section IV. Additional STS data of artificially-created vacancies with designed shape**

- Supplementary Figure 8. Two spatially-separated single vacancies with decreasing spacing.
- Supplementary Figure 9. Localized quantum states around a dimer S-vacancy at the S-terminated surface.
- Supplementary Figure 10. STM images and spectra of five-, six-, and seven- vacancies on S terminated surfaces.
- Supplementary Figure 11. Comparison between upward and downward triangular vacancies.
- Supplementary Figure 12.  $dI/dV$  linecut along the edge of linear atomic S vacancies.
- Supplementary Figure 13.  $dI/dV$  maps of large-size triangular S vacancies.

### **Section V. Calculated energy of bound state with vacancy size and shape**

- Supplementary Figure 14. Energy evolution of bound states for different vacancies.

### **Section VI. More information of strain analysis and peak fitting**

- Supplementary Figure 15. Analysis of the lattice distortion around S vacancies.
- Supplementary Figure 16. Gaussian fitting of the  $dI/dV$  spectra in Fig. 2d and Fig. 4d.

### **Section VII. Extension of vacancy manipulation**

- Supplementary Figure 17. Vacancy manipulation in a  $\text{Co}_3\text{Sn}_2\text{S}_2$ -derived kagome metal,  $\text{Ni}_3\text{In}_2\text{S}_2$ .
- Supplementary Figure 18. Engineering of the S atoms inside large-size vacancy.

### **Section VIII. Comparison between STS and magnetization measurements**

- Supplementary Figure 19.  $B_z$  dependent  $dI/dV$  spectra around S vacancies and magnetization of  $\text{Co}_3\text{Sn}_2\text{S}_2$  crystal.

### Supplementary Figure 1.

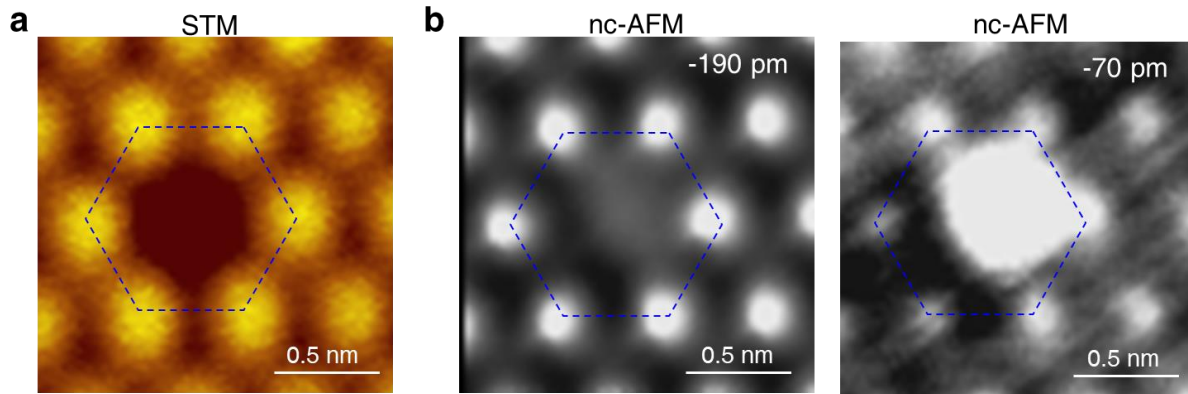

**Supplementary Figure 1. Demonstration of the single vacancy with noncontact atomic force microscope (nc-AFM).** **a**, STM image of the single S vacancy, showing a hole-like feature ( $V_s = -4$  mV,  $I_t = 10$  pA). **b**, Constant-height AFM images by using a CO tip in the same region of (a) with the scanning height of -190 pm (left) and -70 pm (right), respectively, showing the missing S atom at the vacancy site. Scanning height: -190 pm,  $V_s = -4$  mV,  $I_t = 10$  pA. Scanning amplitude = 50 pm.

Supplementary Figure 2.

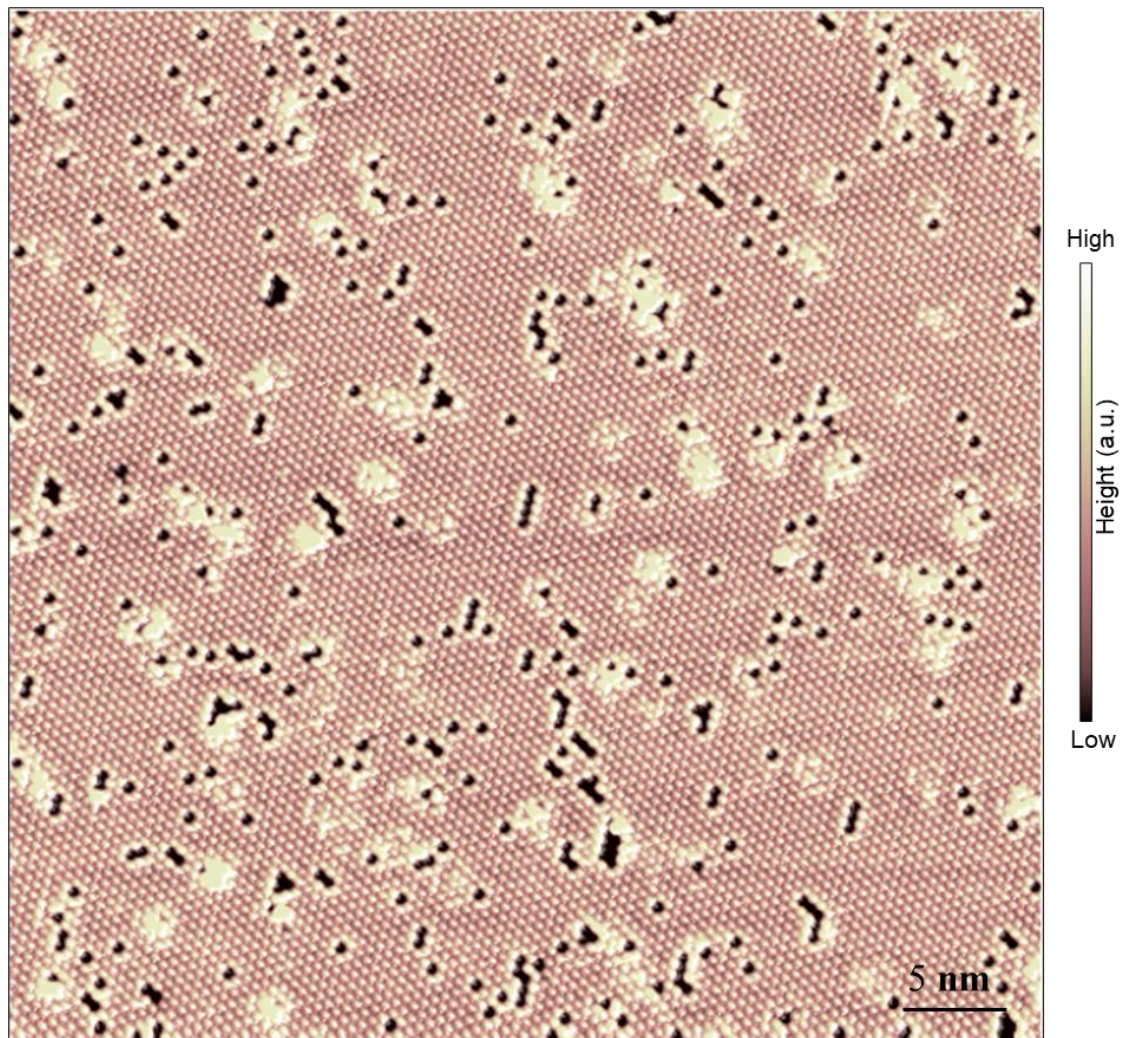

Supplementary Figure 2. Typical large-scale STM image of S-terminated surface, showing randomly-distributed S vacancies with different size and shape. STM parameters:  $V_s = -600$  mV,  $I_t = 100$  pA.

**Supplementary Figure 3.**

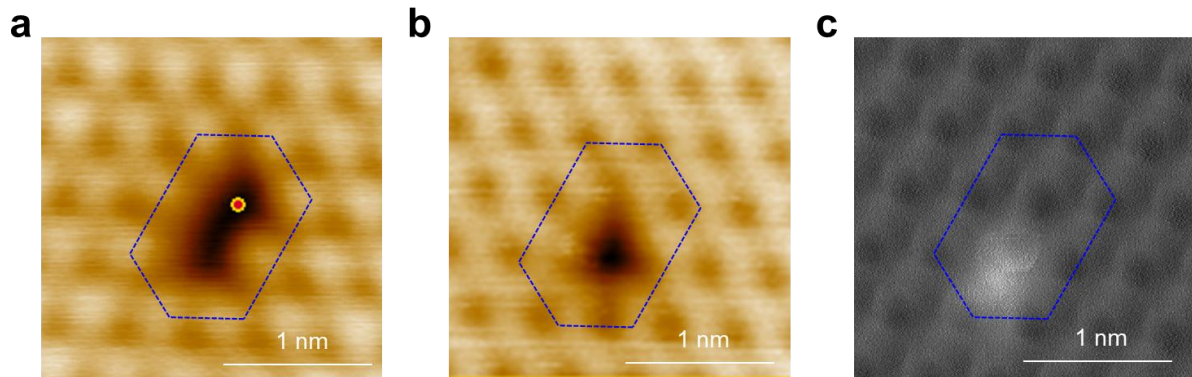

**Supplementary Figure 3. Demonstration of the single vacancy repairing with nc-AFM. a,b** STM images showing the topography before (a) and after (b) vacancy repairing ( $V_s = -4$  mV,  $I_t = 10$  pA). **c**, Constant-height AFM images at the same region of (b), showing the filling of an additional S atom at the vacancy site as marked by the red spot in (a). Scanning height:  $-190$  pm,  $V_s = -4$  mV,  $I_t = 10$  pA. Scanning amplitude =  $50$  pm.

Supplementary Figure 4.

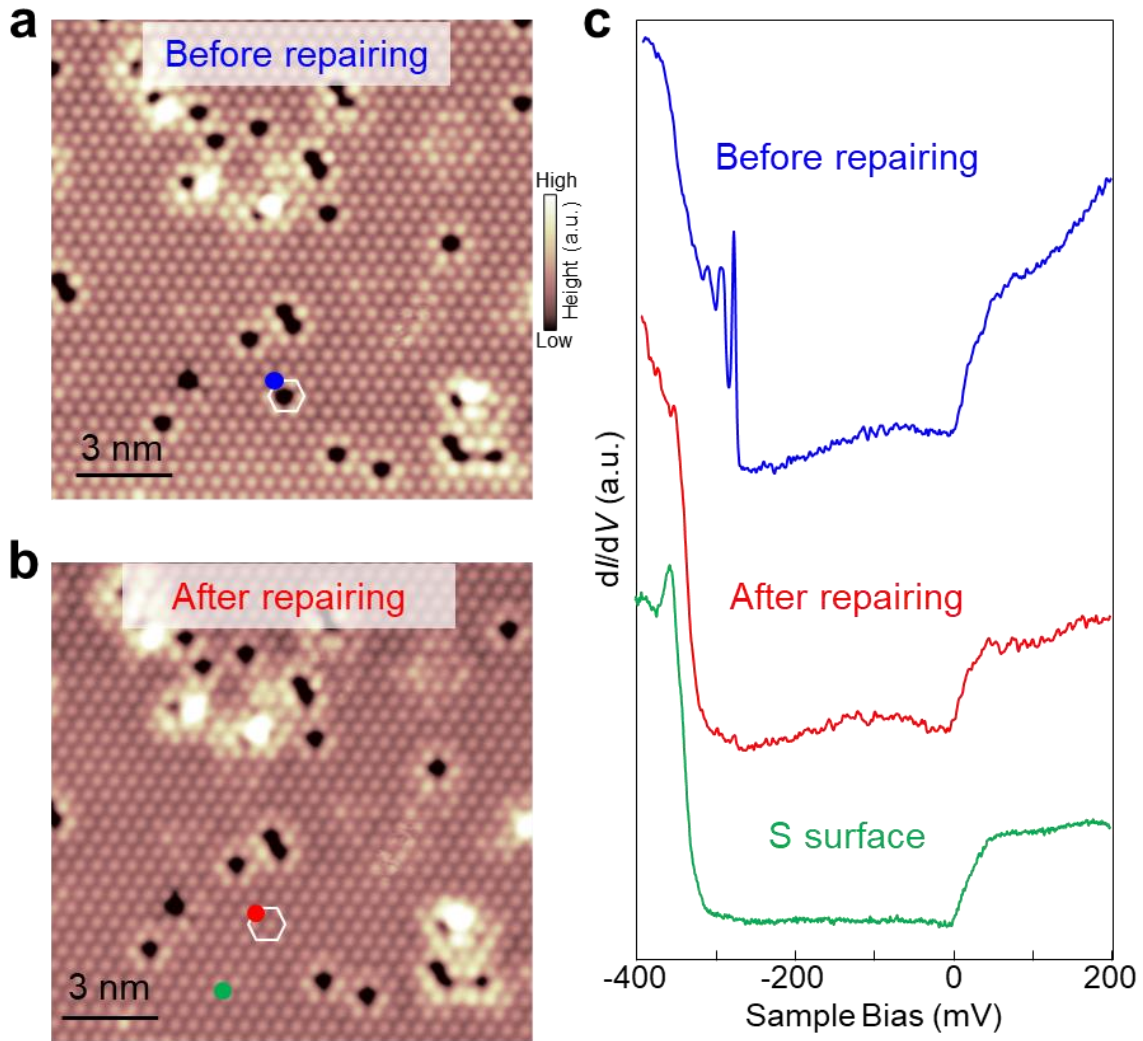

**Supplementary Figure 4. Topography and  $dI/dV$  spectra of S vacancies before and after vacancy repair.** a,b STM images before (a) and after (b) STM manipulations, showing that a single S vacancy is repaired ( $V_s = -400$  mV,  $I_t = 500$  pA). c, Typical  $dI/dV$  spectra obtained at the blue, red and green spots, respectively, showing the similar density of state at the as-repaired vacancy with vacancy-free S surface region ( $V_s = -400$  mV,  $I_t = 500$  pA,  $V_{\text{mod}} = 0.5$  mV).

### Supplementary Figure 5.

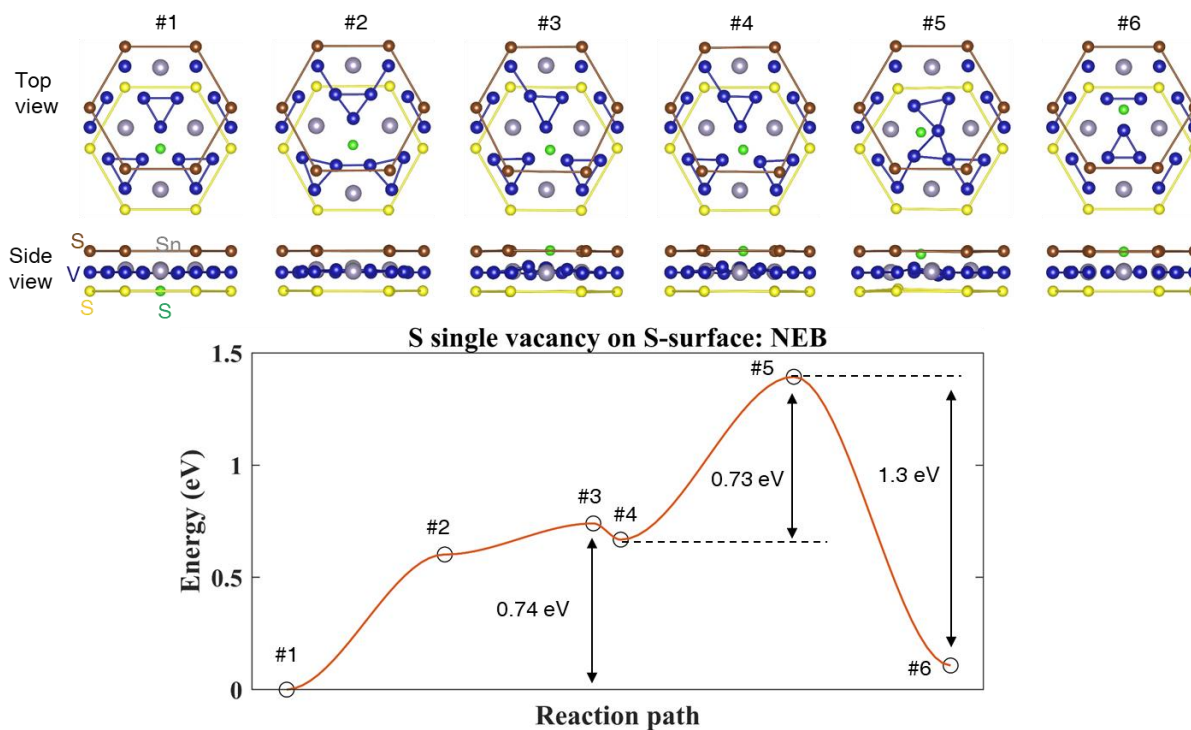

**Supplementary Figure 5. Transition barrier of a S atom from the bulk to the single vacancy site on the S-surface.** Four intermediate structures in the Nudged Elastic Band (NEB) calculations are considered as #2 ~#5, where #1 and #6 show the surface S vacancy and bulk S vacancy respectively (only the three top-most layers are shown for simplicity). The S (green) moves in out-of-plane direction from #1 to #3 (barrier ~ 0.74 eV), and moves in the surface plane from #3 to #6 (barrier ~ 0.73 eV). Notice that structures #3 and #4 are very close but not the same. The medium energy barrier indicates that pulling one S from the bulk to occupy the surface vacancy site is possible. Spin-orbit coupling is not included.

### Supplementary Figure 6.

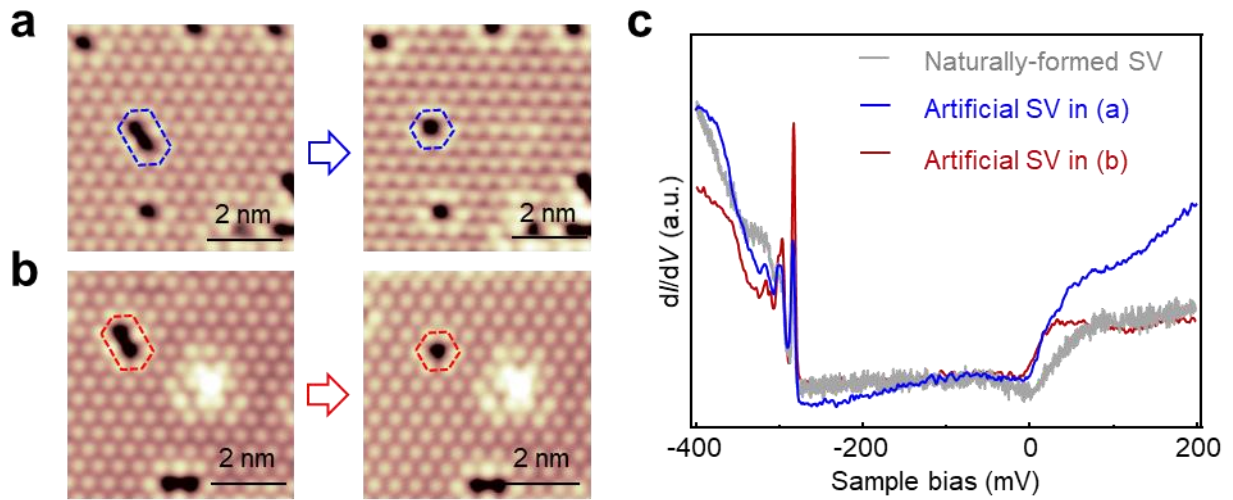

**Supplementary Figure 6. Comparison of bound states between various artificially created vacancy and naturally formed vacancies. a,b** STM images showing two cases of repairing a dimer vacancy into a single vacancy. ( $V_s = -400$  mV,  $I_t = 500$  pA). **c**, The  $dI/dV$  spectra obtained at artificial single vacancies in (a) and (b), showing similar features with the naturally formed single vacancies near Fermi level. ( $V_s = -400$  mV,  $I_t = 500$  pA,  $V_{\text{mod}} = 0.5$  mV).



### Supplementary Figure 7.

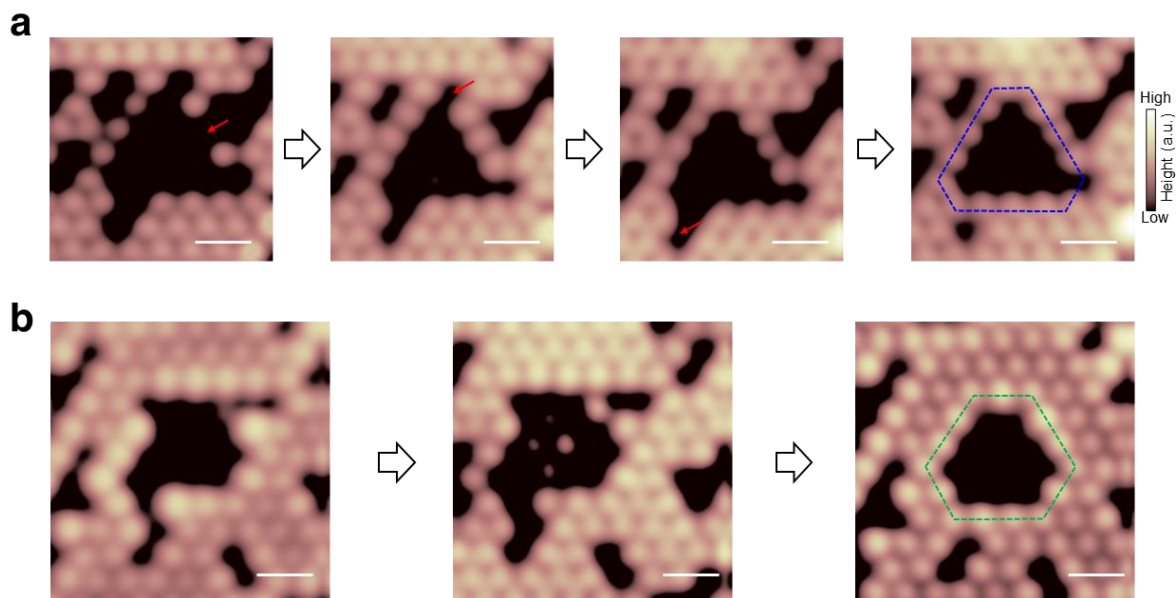

**Supplementary Figure 7. Step-by-step atomic manipulation of S vacancy aggregates: from irregular to regular vacancy shape. a**, Consecutive STM images of a large vacancy being repaired and transformed into a quasi-triangular vacancy highlighted by the dotted blue triangle ( $V_s = -100$  mV,  $I_t = 500$  pA). **b**, Consecutive STM images of another large vacancy being repaired and transformed into a quasi-hexagonal vacancy highlighted by the dotted green hexagon ( $V_s = -100$  mV,  $I_t = 500$  pA). The scale bars in all figures correspond to 1 nm.

Supplementary Figure 8.

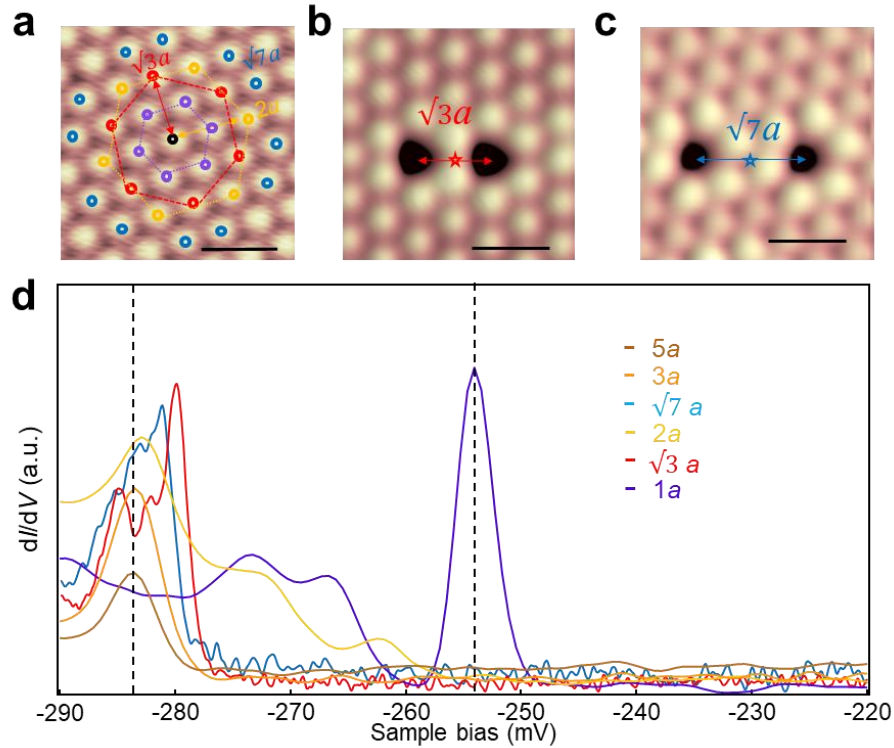

**Supplementary Figure 8. Two spatially separated single vacancies with decreasing spacing.** **a**, STM image of perfect S surface showing the nearest-neighbor (purple), second-nearest-neighbor (red), third-nearest-neighbor (yellow) and forth-nearest-neighbor atoms (cyan) around the center S atom. ( $V_s = -400$  mV,  $I_t = 500$  pA). **b,c** STM images of two spatially-separated vacancy with second-nearest-neighbor and forth-nearest-neighbor distance. **d**,  $dI/dV$  spectra for two spatially-separated vacancy with decreasing spacing  $L$ , showing that the primary peak shifts when  $L < 3a$  ( $a$  is the lattice constant of  $\text{Co}_3\text{Sn}_2\text{S}_2$ ) ( $V_s = -300$  mV,  $I_t = 500$  pA,  $V_{\text{mod}} = 0.5$  mV). The scale bars in all figures correspond to 1 nm.

## Supplementary Figure 9.

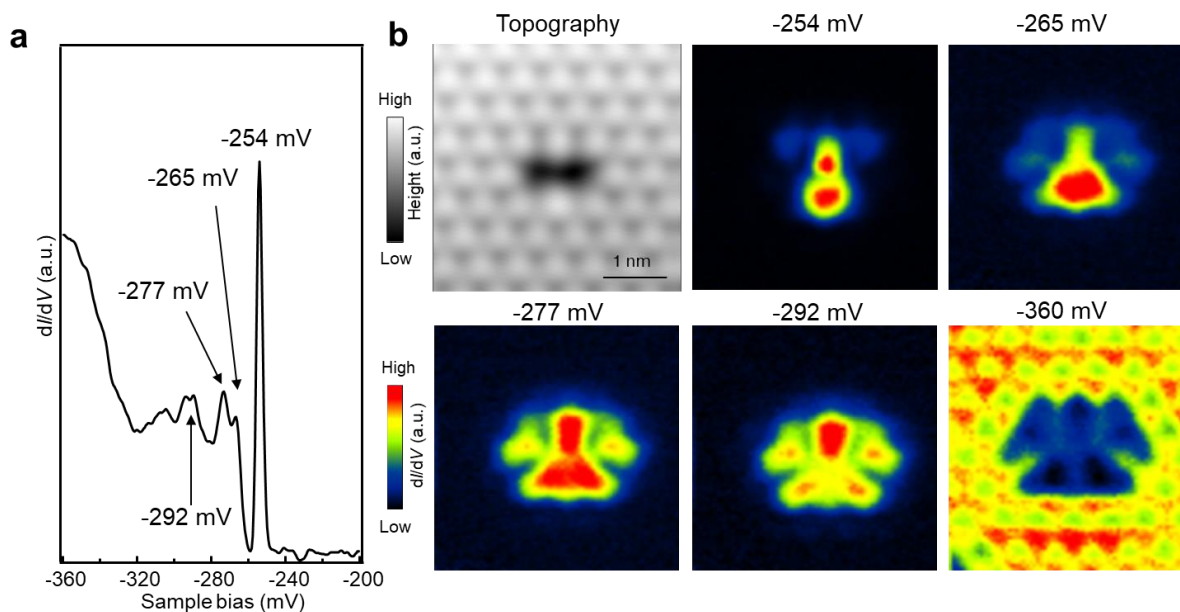

**Supplementary Figure 9. Localized quantum states around a dimer S vacancy at the S-terminated surface.** **a**,  $dI/dV$  spectra at a dimer vacancy, showing several peaks corresponding to the bound states induced by the vacancy. **b**, STM image of a dimer vacancy and  $dI/dV$  maps at different energies: -254 meV, -265 meV, -277 meV, -292 meV, and -360 meV, respectively.  $V_s = -360$  mV,  $I_t = 500$  pA,  $V_{\text{mod}} = 0.2$  mV

Supplementary Figure 10.

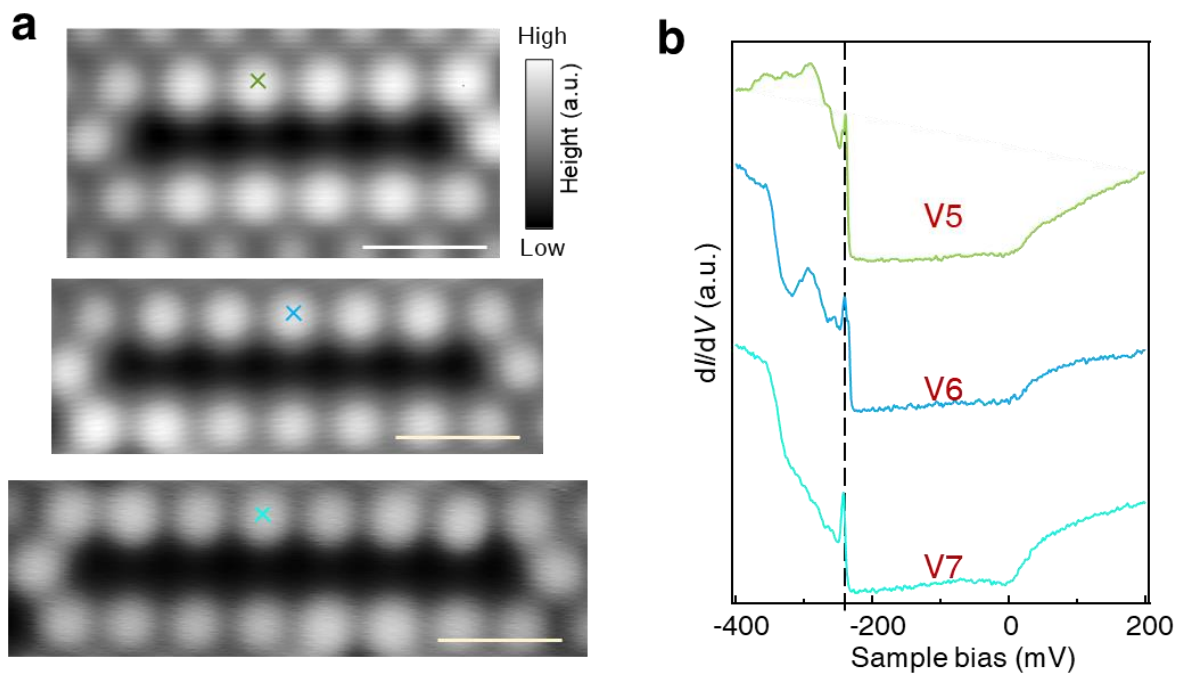

**Supplementary Figure 10. STM images and spectra of five-, six-, and seven- atomic vacancies on S terminated surfaces.** **a**, STM images showing five-, six-, and seven- atomic vacancies on S-terminated surfaces. **b**,  $dI/dV$  spectra on the positions (marked by light blue, blue and green cross in **(a)**, respectively) of the five-, six-, and seven- atomic vacancies, respectively, showing the sharp peak around -240 mV. The scale bar is 1 nm in **(a)** and **(b)**.  $V_s = -400$  mV,  $I_t = 500$  pA,  $V_{\text{mod}} = 0.2$  mV.

Supplementary Figure 11.

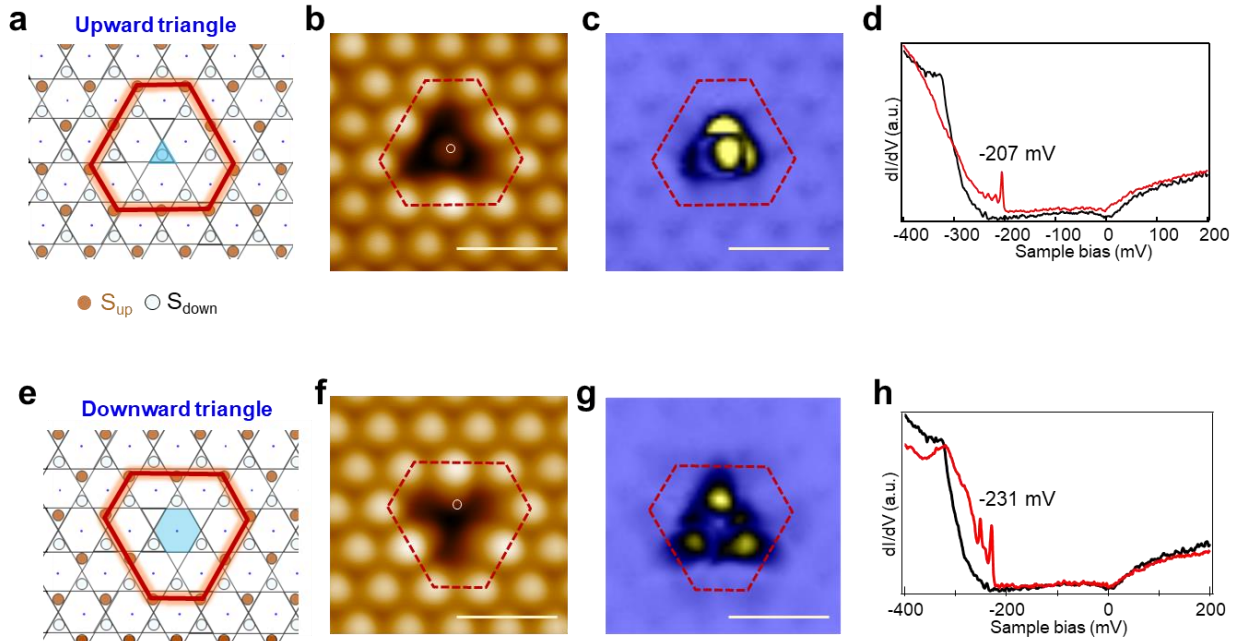

**Supplementary Figure 11. Comparison between upward and downward triangular vacancies.** **a**, Schematic showing the upward triangular vacancy where a Co-based triangle of the  $\text{Co}_3\text{Sn}$  kagome unit is centered in vacancy. **b-d**, STM image,  $dI/dV$  map at  $-207$  mV and  $dI/dV$  curves obtained at the position marked by white circle in **(b)**, respectively, showing the primary bound state is strongest at the vacancy center. **e**, Schematic showing the downward triangular vacancy where a hexagon of  $\text{Co}_3\text{Sn}$  kagome unit is centered in vacancy. **f-h**, STM image,  $dI/dV$  map at  $-231$  mV and  $dI/dV$  curves obtained at the position marked by white circle in **(f)**, respectively, showing the distribution of primary bound state. The scale bars in all figures correspond to 1 nm. STM parameters:  $V_s = -400$  mV,  $I_t = 500$  pA,  $V_{\text{mod}} = 0.2$  mV.

Supplementary Figure 12.

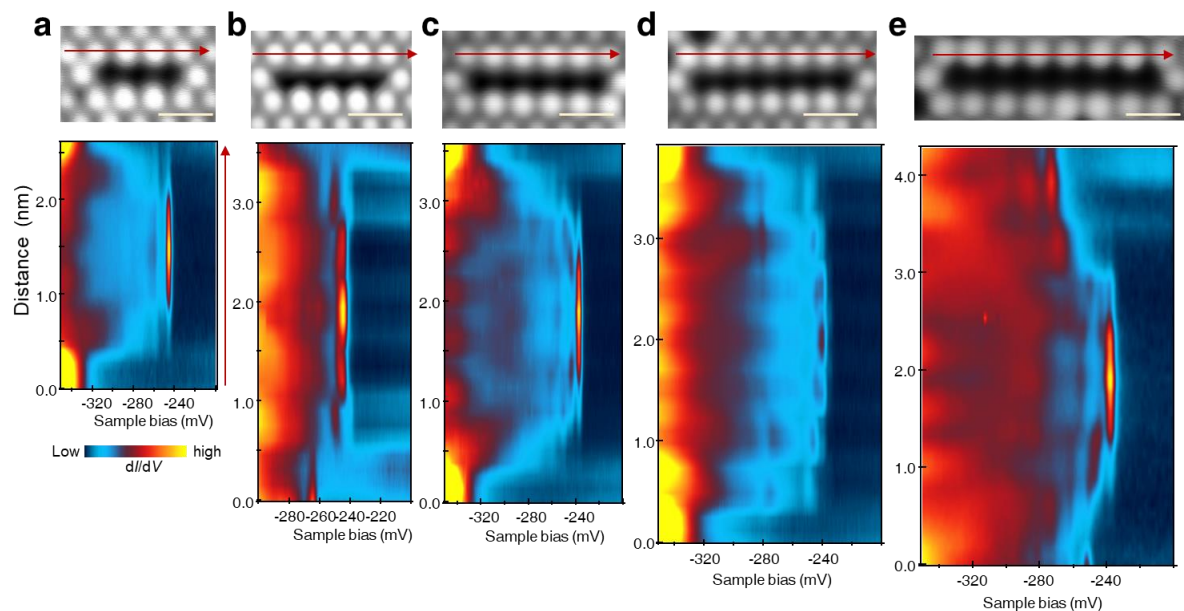

Supplementary Figure 12. The  $dI/dV$  linecut along the edge of linear atomic S vacancies. a-e STM topography of linear atomic vacancies and  $dI/dV$  linecut along the red arrow, showing the spatial decay of the bound states with the atomic shift. The scale bar is 1 nm.  $V_s = -300$  mV,  $I_t = 500$  pA,  $V_{\text{mod}} = 0.5$  mV.

### Supplementary Figure 13.

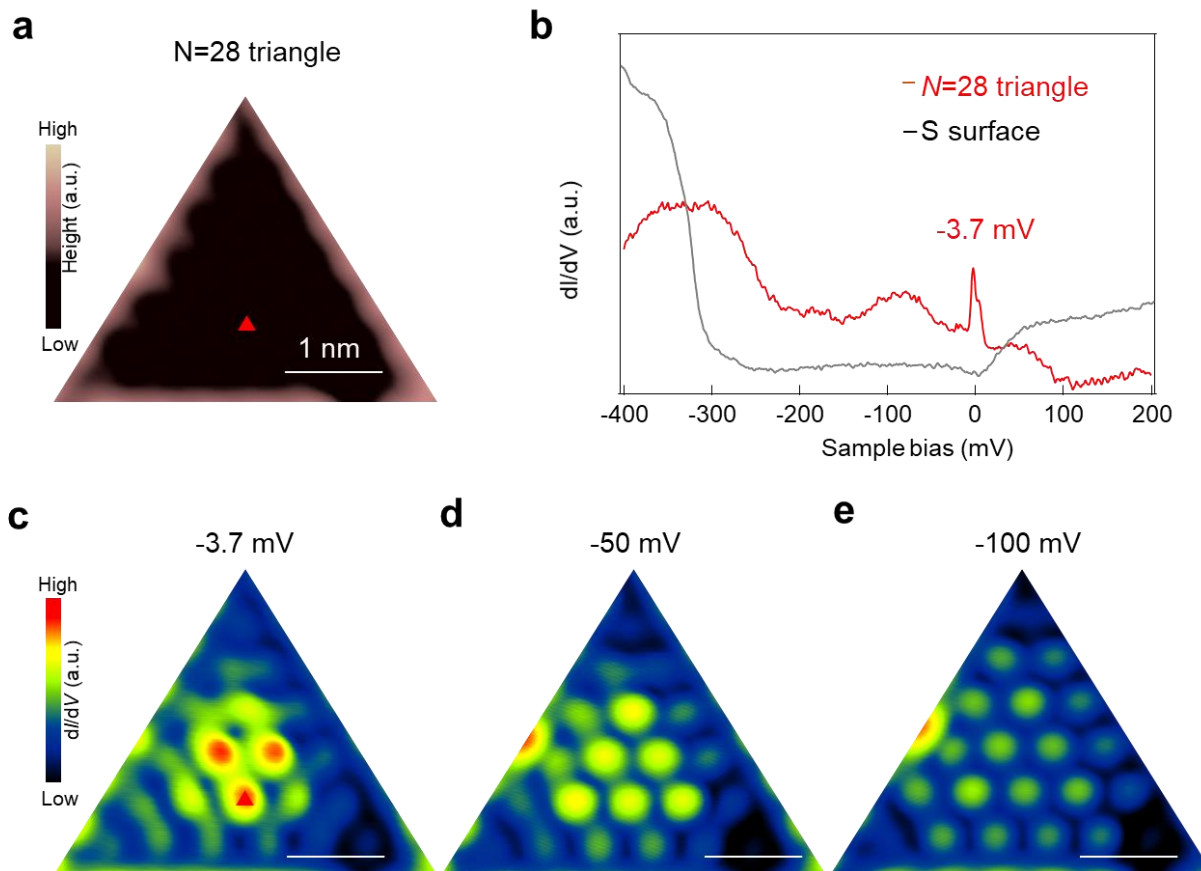

**Supplementary Figure 13.  $dI/dV$  maps of large-size triangular S vacancies.** **a**, STM topography of large-size triangular vacancy ( $N=28$ ). **b**,  $dI/dV$  spectra obtained at the vacancy center (red triangle in **a**) and the S surface, respectively, showing the sharp conductance peak at  $-3.7$  mV. **c-e**, the  $dI/dV$  maps at  $-3.7$  mV (**c**),  $-50$  mV (**d**) and  $-100$  mV (**e**), respectively, showing the quantum confinement. STM parameter:  $V_s = -400$  mV,  $I_t = 500$  pA,  $V_{\text{mod}} = 0.5$  mV.

Supplementary Figure 14.

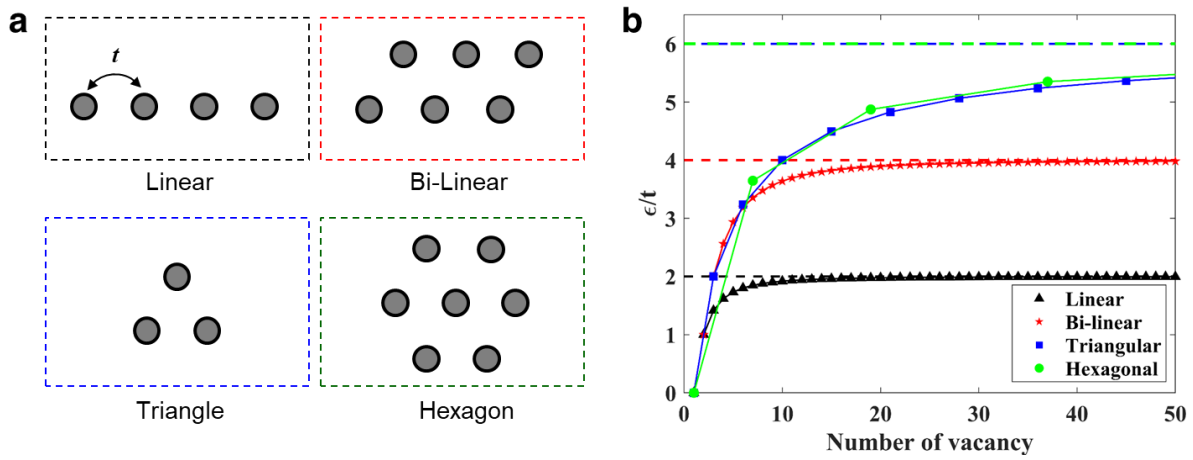

**Supplementary Figure 14. Energy evolution of anti-bonding states for different vacancies. a,** The model with a single hopping parameter,  $t$ , is considered in for simulation of the inter-vacancy interaction. The linear, bilayer and triangular (also hexagonal) configurations are considered. **b,** Energy evolution of the anti-bonding states for different vacancies based on the model in (a). In the vacancy number, the relative energy levels ( $\epsilon/t$ ) saturate to corresponding infinite size cases,  $2t$ ,  $4t$  and  $6t$  for linear, bilayer and triangular (also hexagonal) configurations.



Supplementary Figure 15.

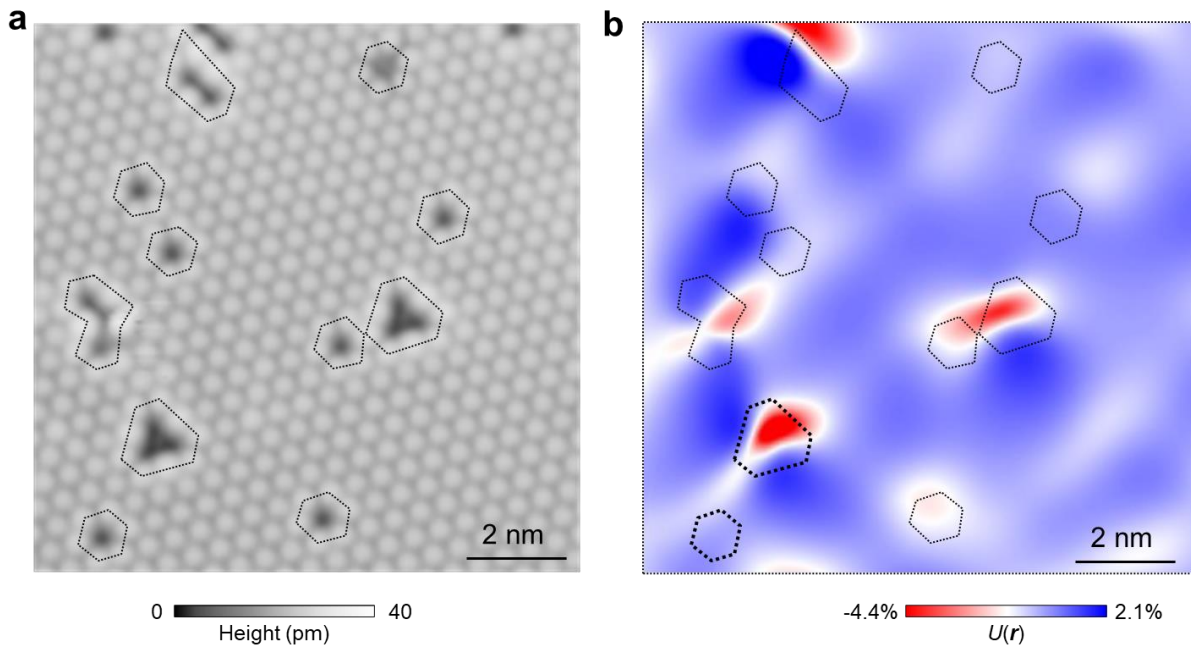

**Supplementary Figure 15. Analysis of the lattice distortion around S vacancies.** The antisymmetric strain map  $U(\mathbf{r}) \equiv u_{aa}(\mathbf{r}) - u_{bb}(\mathbf{r})$  (a) are derived from STM topography (b), showing that the relatively-larger lattice distortion is localized at the triangular vacancies.  $V_s = -400$  mV,  $I_t = 500$  pA.

## Supplementary Figure 16.

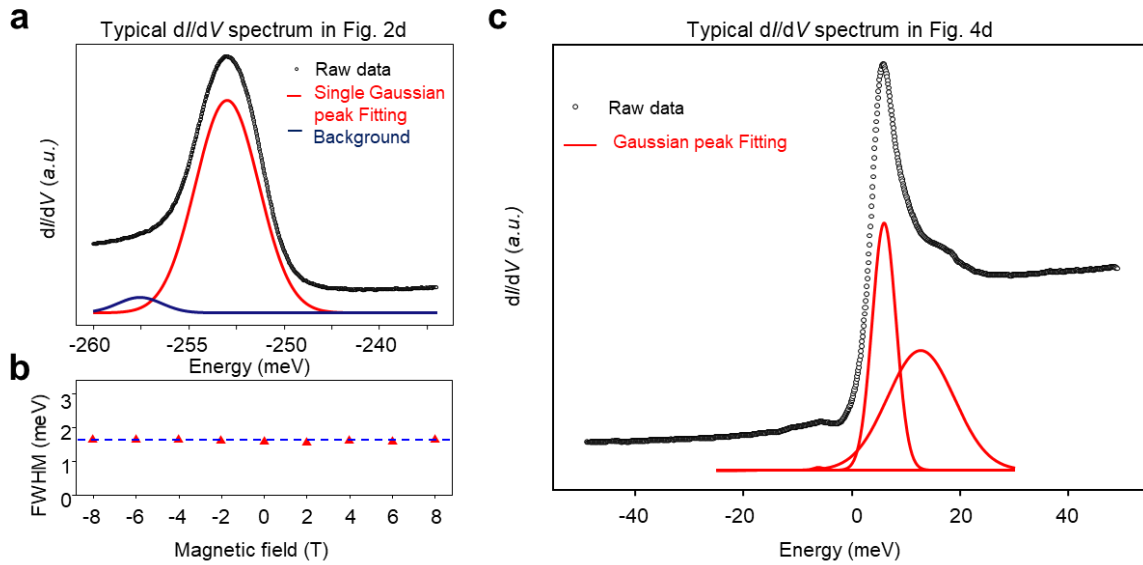

**Supplementary Figure 16. Gaussian fitting of the  $dI/dV$  spectra in Fig. 2d and Fig. 4d. a,** Fitting of one typical  $dI/dV$  spectrum in Fig. 2d, showing that the peak can be fitted by a simple Gaussian peak. **b,** Evolution of FWHM (full width at half maximum) subtracted from Gaussian fitting with magnetic field, showing no significant variation with the field. **c,** Fitting of one typical  $dI/dV$  spectrum in Fig. 2d, showing that the peak cannot be fitted by a simple Gaussian peak.

Supplementary Figure 17.

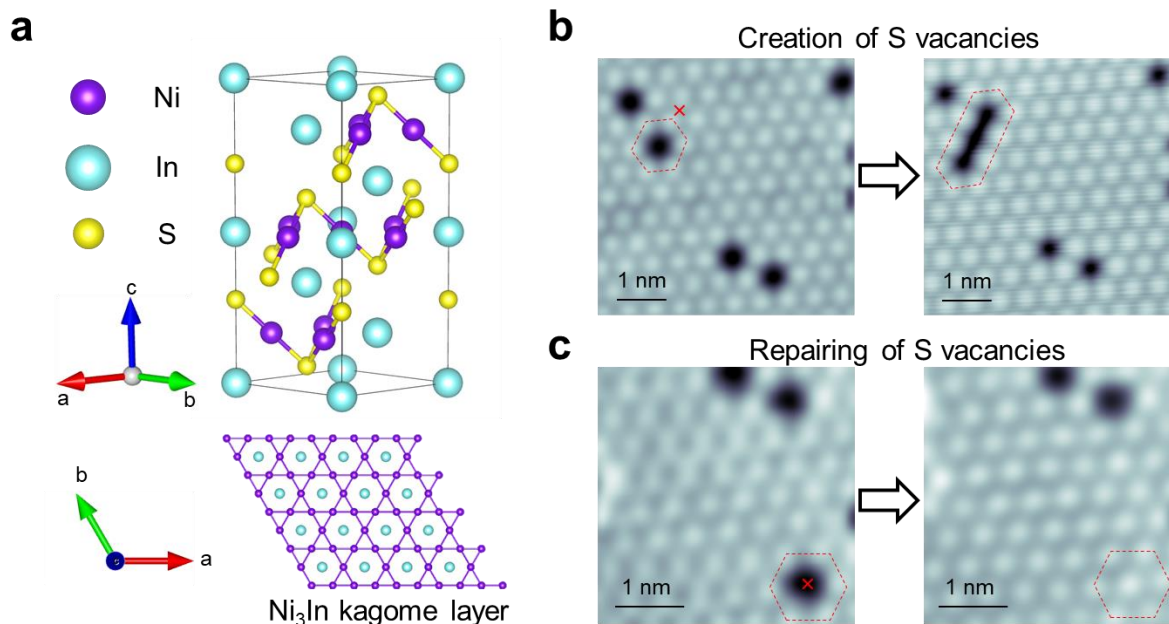

**Supplementary Figure 17.** Vacancy manipulation in a  $\text{Co}_3\text{Sn}_2\text{S}_2$  derived kagome metal,  $\text{Ni}_3\text{In}_2\text{S}_2$ . **a**, Atomic structure of  $\text{Ni}_3\text{In}_2\text{S}_2$ . **b**, STM images showing the topography before (left) and after (right) vacancy creation, demonstrating the remove of S atom at surface. **c**, STM images showing the topography before (left) and after (right) vacancy repair, demonstrating the filling of S atom. STM scanning parameters for (**b-c**):  $V_s = -300$  mV;  $I_t = 500$  pA.

**Supplementary Figure 18.**

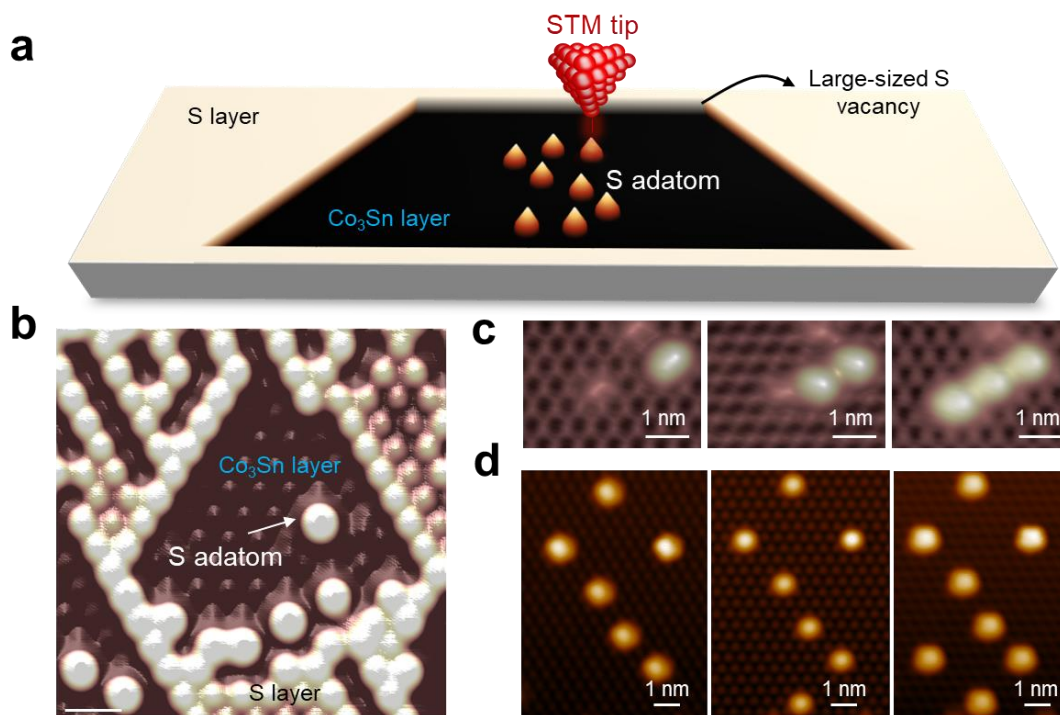

**Supplementary Figure 18. Engineering of the S atoms inside large-size vacancy.** **a**, Schematics of tip-assisted atomically precise engineering of S atoms inside large-size S vacancy. **b**, STM image showing that exposure of Co<sub>3</sub>Sn layer when the S vacancies at S-terminated surface become relatively large. Some single S adatoms highlighted by the white arrows are observed. **c**, STM images showing the construction of S atomic chains with gradually increased length. **d**, Series of STM images showing the process to write a “S” letter by engineering the atomic S adatoms. The scale bar in all figures are 1 nm.  $V_s = -400$  mV,  $I_t = 500$  pA.

Supplementary Figure 19.

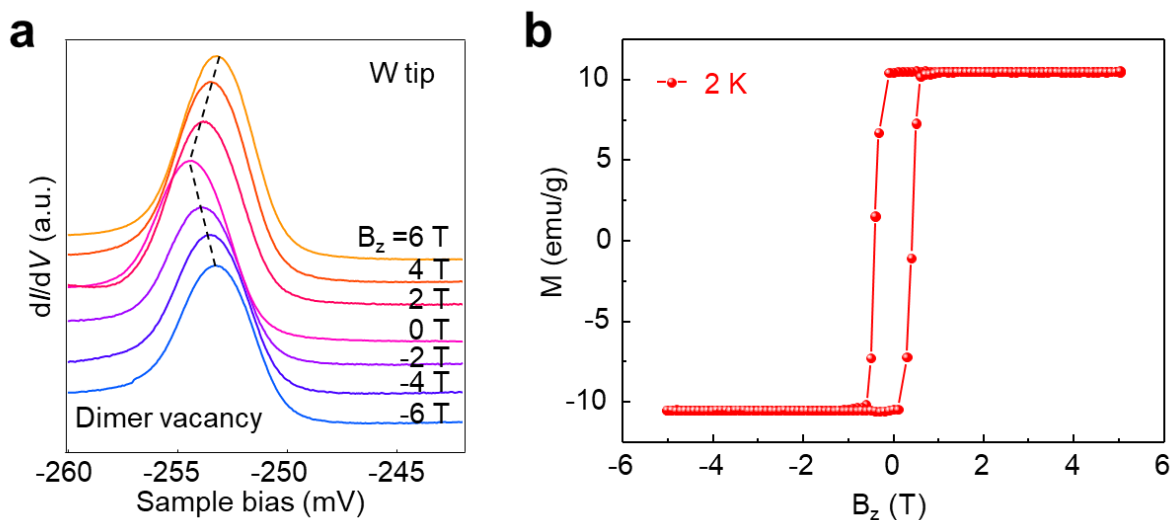

Supplementary Figure 19. Comparison with magnetic field  $dI/dV$  spectra obtained at S vacancies of  $\text{Co}_3\text{Sn}_2\text{S}_2$  surface (a) and magnetization of bulk  $\text{Co}_3\text{Sn}_2\text{S}_2$  crystal (b). The coercive field is approximately 4500 Oe, and the saturation magnetization is 10.38 emu/g. The magnetic moment corresponding to a cobalt atom is about  $0.3 \mu_B$ .
